# Supplementary material
Source: Springer Nature journal article supplement (https://www.springermedizin.de/resource/supplementary/12872_2012_540_MOESM1_ESM.pdf/9430156)

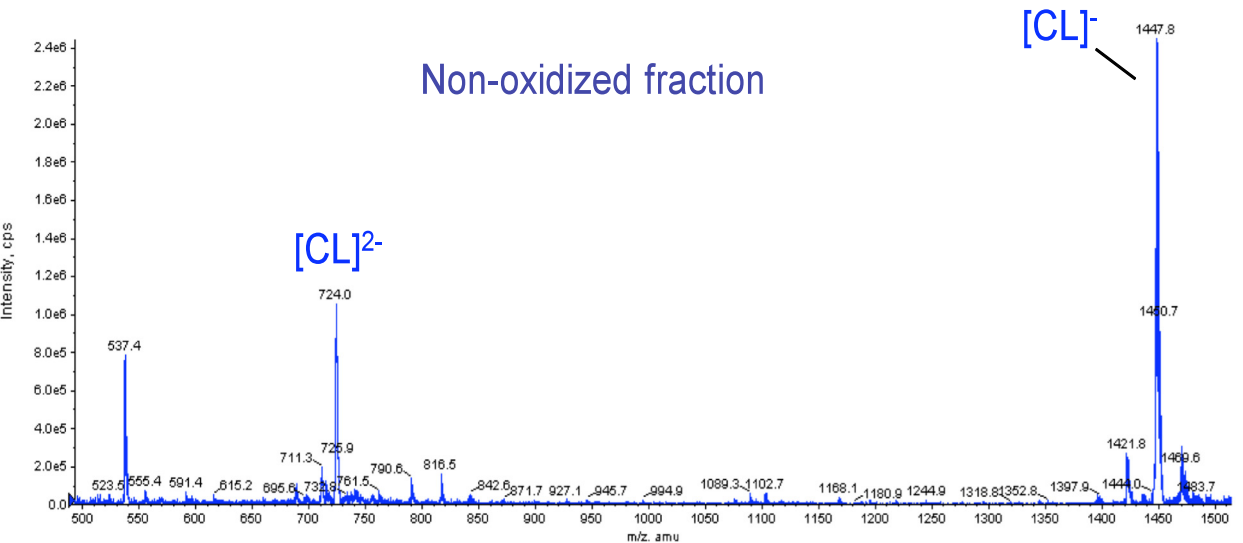

EMS: 7.704 to 7.999 min from Sample 1 (cardiolipin ox) of 0703i017.wiff (Turbo Spray), subtracted (6.380 to 7.101 min)

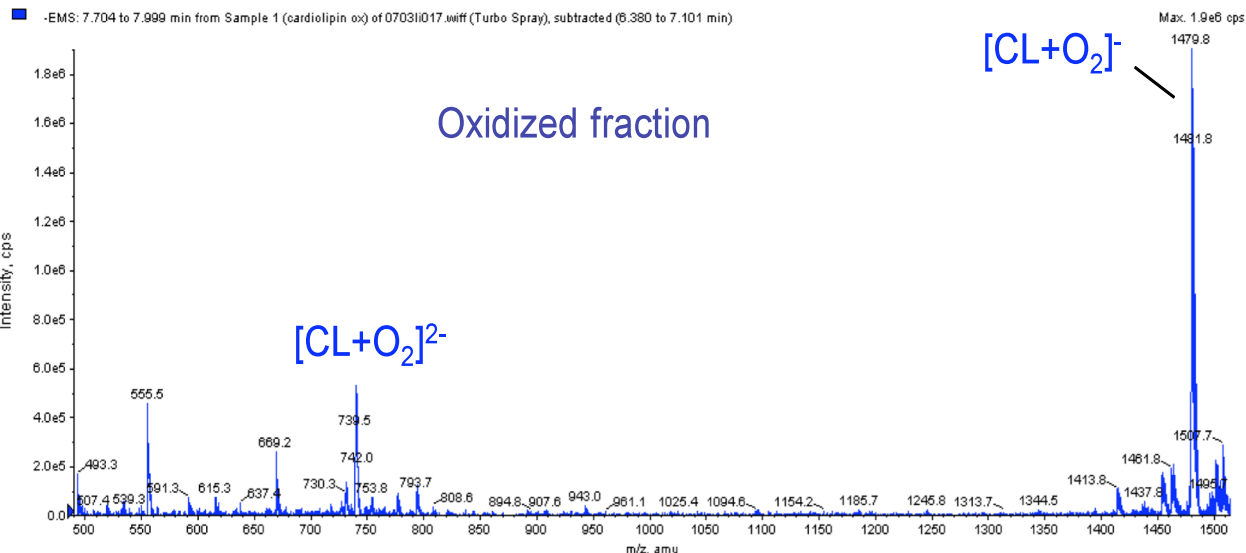

Supplement: MOESM1 [file 9430156]
